# Supplementary material for: CuS concave polyhedral superstructures enabled efficient N2 electroreduction to NH3 at ambient conditions
Source: Royal Society of Chemistry journal article supplement (doi:10.1039/d1qi00306b), 2021-01-01
Supplement: d1qi00306b1.pdf [file d1qi00306b1.pdf]

## Electronic Supplementary Information

### Experimental Section

**Materials:**  $\text{Cu}(\text{NO}_3)_2 \cdot x\text{H}_2\text{O}$  (99.9%), S (99.9%),  $\text{CuCl}_2 \cdot 2\text{H}_2\text{O}$  (99.0%), HCl (99.0%),  $\text{CH}_4\text{N}_2\text{S}$ ,  $(\text{CH}_2\text{OH})_2$ , thioacetamide, N-(1-naphthyl), sulfanilamide, para-(dimethylamino) benzaldehyde, salicylic acid, NaClO (5.5%), NaOH,  $\text{LiNO}_3$ ,  $\text{CH}_3\text{COCH}_3$ ,  $\text{C}_6\text{H}_5\text{Na}_3\text{O}_7 \cdot 2\text{H}_2\text{O}$ , Nafion (5.0% wt),  $\text{Na}_2[\text{Fe}(\text{CN})_5\text{NO}] \cdot 2\text{H}_2\text{O}$ ,  $\text{N}_2\text{H}_4 \cdot \text{H}_2\text{O}$ ,  $\text{NH}_4\text{Cl}$ ,  $\text{H}_2\text{SO}_4$ , HCl (99.0%),  $\text{H}_2\text{O}_2$  (5.0%) and  $\text{C}_2\text{H}_5\text{OH}$  were obtained from Aladdin Ltd. (Shanghai, China). The ultrapure water was purified through a Millipore process. Ultra-pure Ar (99.999%) and  $\text{N}_2$  (99.999%) were obtained from Chengdu Guoguang Chemical Co., Ltd. All reagents were analytical grade and did not further purify.

**Preparation of CuS concave polyhedral superstructures (CuS-CPSs):** 0.5 mmol  $\text{Cu}(\text{NO}_3)_2 \cdot x\text{H}_2\text{O}$  and 1 mmol sulfur powder were added into a 40 mL Teflon-lined stainless steel autoclave. Then add 32 mL of anhydrous ethanol and stir vigorously. The autoclave was kept at 180 °C for 12 h and then cooled naturally to the room temperature. Finally, the black precipitate was centrifuged and washed three times with deionized water and ethanol, then dried in vacuum at 60 °C.<sup>1</sup>

**Preparation of CuS-CPSs/CP:** Carbon paper (CP) was pretreated in 0.05 M  $\text{H}_2\text{SO}_4$ , and then was sequentially cleaned in ethanol and deionized water several times by sonication. 10 mg CuS-CPSs and 40  $\mu\text{L}$  5 wt% Nafion solution were dispersed in 960  $\mu\text{L}$  ethanol/water ( $V_{\text{ethanol}}/V_{\text{water}} = 3/1$ ) followed by 20 min sonication to form a homogeneous ink. 10  $\mu\text{L}$  ink was loaded onto a CP ( $1 \times 1 \text{ cm}^2$ ) and dried under room temperature (CuS-CPSs loading: 0.1 mg  $\text{cm}^{-2}$ ). The sample was obtained as CuS-CPSs/CP.

**Preparation of CuS nanoparticles (CuS-NPs):** 0.5 g of  $\text{Cu}(\text{NO}_3)_2 \cdot x\text{H}_2\text{O}$ , 0.7 g of  $\text{CH}_4\text{N}_2\text{S}$ , and 20 mL of  $(\text{CH}_2\text{OH})_2$  were mixed in a beaker. The system was under initial vacuum and then nitrogen gas was introduced to minimize the exposure to air. The temperature was kept at 110 °C for ten minutes. A mixture of 5 mL of 1 M NaOH and 5 mL of  $(\text{CH}_2\text{OH})_2$  was injected into the beaker. The solution was then held for an additional five minutes before cooling down to room temperature. The CuS-NPs

were separated by centrifuging for 10 min at 10000 rpm. The CuS-NPs were washed five times with water quickly to remove the excessive ions and precursors.

**Preparation of CuS nanosheet assemblies (CuS-NSAs):** CuS-NSAs were prepared by a simple microwave-assisted heating method. First, 4 mmol  $\text{CuCl}_2 \cdot 2\text{H}_2\text{O}$  and 5 mmol thioacetamide were mixed with deionized water (80 mL) and ethanol (40 mL) in a 250 mL beaker. Then, the mixture was stirred vigorously for 30 min at room temperature. Next, the synthetic reaction was carried out in a microwave reactor at 500 W for 10 min. After cooling to room temperature, large amounts of gray precipitates were obtained. Finally, the as-synthesized samples were separated by a centrifuge, washed five times with deionized water and ethanol, followed by vacuum drying for 12 h.

**Characterizations:** Power XRD data were acquired by a LabX XRD-6100 X-ray diffractometer with a  $\text{Cu K}\alpha$  radiation (40 kV, 30 mA) of wavelength 0.154 nm (SHIMADZU, Japan). The absorbance data of spectrophotometer was measured on SHIMADZU UV-1800 UV-vis spectrophotometer. SEM images were collected on a Gemini SEM 300 scanning electron microscope (ZEISS, Germany) at an accelerating voltage of 5 kV. TEM images were acquired on a HITACHI H-8100 electron microscopy (Hitachi, Tokyo, Japan) operated at 200 kV. XPS measurements were performed on an ESCALABMK II X-ray photoelectron spectrometer using Mg as the exciting source.

**Electrochemical measurements:** In this paper, we use an H-type electrolytic cell separated by a Nafion membrane which was protonated by boiling in ultrapure water,  $\text{H}_2\text{O}_2$  (5%) aqueous solution and 0.5 M  $\text{H}_2\text{SO}_4$  at 80 °C for another 2 h, respectively. A three-electrode configuration is used for electrochemical experiments using catalyst coated carbon paper as the working electrode, Ag/AgCl (filled with saturated KCl solution) as the reference electrode, and graphite rod as the counter electrode. The electrochemical experiments were carried out with an electrochemical workstation (CHI 660E) in  $\text{N}_2$ -saturated 0.1 M HCl solution. The potentials reported in this work were converted to reversible hydrogen electrode (RHE) scale via calibration with the following equation:  $E_{\text{RHE}} = E_{\text{Ag/AgCl}} + 0.197 \text{ V} + 0.059 \times \text{pH}$  and the presented current density was normalized to the geometric surface area.

**Determination of NH<sub>3</sub>:** Concentration of produced NH<sub>3</sub> was spectrophotometrically determined by the indophenol blue method.<sup>2</sup> 2 mL sample was removed from the cathodic chamber, then added into 1 mL of oxidizing solution containing NaClO ( $p_{Cl} = 4 \sim 4.9$ ), then added 2 mL coloring solution containing 1 M NaOH solution, 5% C<sub>7</sub>H<sub>6</sub>O<sub>3</sub> and 5% C<sub>6</sub>H<sub>5</sub>Na<sub>3</sub>O<sub>7</sub>·2H<sub>2</sub>O, and 200 μL catalyst solution (0.1 g Na<sub>2</sub>[Fe(CN)<sub>5</sub>NO]·2H<sub>2</sub>O diluted to 10 ml with deionized water) in turn. Absorbance measurements were performed after one hour at  $\lambda = 655$  nm. The concentration-absorbance curves were calibrated using standard NH<sub>3</sub> solution with a series of concentrations. The standard curve ( $y = 0.385x + 0.048$ ,  $R^2 = 0.999$ ) shows good linear relation of absorbance value with NH<sub>3</sub> concentration by three times independent calibrations.

**Determination of N<sub>2</sub>H<sub>4</sub>:** N<sub>2</sub>H<sub>4</sub> was estimated by the method of Watt and Chrisp.<sup>3</sup> The color reagent was a mixed solution of 5.99 g C<sub>9</sub>H<sub>11</sub>NO, 30 mL HCl and 300 mL C<sub>2</sub>H<sub>5</sub>OH. In detail, 5 mL electrolyte was removed from the electrochemical reaction vessel, and added into 5 mL prepared color reagent and stirred 15 min at 25 °C. The absorbance of such solution at the absorbance of 455 nm was measured to quantify the hydrazine yields with a standard curve of hydrazine ( $y = 0.469x + 0.0523$ ,  $R^2 = 0.999$ ).

**Determination of NO<sub>3</sub><sup>-</sup>:** The content of the NO<sub>3</sub><sup>-</sup> in electrolyte can be quantitatively determined by spectrophotometer measurement.<sup>4</sup> 0.10 mL of 1.0 M HCl were added into 5.0 mL of standard LiNO<sub>3</sub> solution. After standing for 5 min, the concentration of NO<sub>3</sub><sup>-</sup> was measured using UV-vis spectrophotometer at wavelength range from 200 to 300 nm. The standard curve ( $y = 0.084x + 0.001$ ,  $R^2 = 0.999$ ) shows good linear relation of absorbance value with NO<sub>3</sub><sup>-</sup> concentration by three times independent calibrations.

**Determination of NO<sub>2</sub><sup>-</sup>:** Spectrophotometer measurement<sup>4</sup> was utilized to estimate the content of the NO<sub>2</sub><sup>-</sup>. In detail, 0.10 mL of sulfanilamide solution (0.50 g of sulfanilamide was dissolved in 50.0 mL of 2.0 M HCl solution) was added into 5.0 mL of electrolyte, then adding 1 mg/mL N-(1-naphthyl) solution in turn. Stand for 30 min at room temperature. The UV-vis spectrophotometer at wavelength ranges from 450 to 650 nm. The absorbance of such solution at 545 nm was measured to quantify the NO<sub>3</sub><sup>-</sup> concentration by a standard curve ( $y = 1.777x + 0.007$ ,  $R^2 = 0.999$ ).

**Determination of FE and  $V_{\text{NH}_3}$ :** FE was calculated by equation:

$$\text{FE} = [3F \times c_{\text{NH}_3} \times V / (17 \times Q)] \times 100\%$$

$\text{NH}_3$  yield ( $V_{\text{NH}_3}$ ) was calculated using the following equation:

$$V_{\text{NH}_3} = (c_{\text{NH}_3} \times V) / (t \times m)$$

The mass of  $\text{NH}_3$  was calculated as follows:

$$m_{\text{NH}_3} = c_{\text{NH}_3} \times V$$

Where F is the Faraday constant ( $96500 \text{ C mol}^{-1}$ );  $c_{\text{NH}_3}$  is the measured  $\text{NH}_3$  concentration; Q is the total quantity of applied electricity; V is the volume of the HCl electrolyte for  $\text{NH}_3$  collection (35 mL); t is the electrolysis time (2 h) and m is the catalyst loading mass (0.1 mg).

### Computational methods

The spin-polarized first-principles DFT calculations were performed using the Vienna Ab initio Simulation Package (VASP).<sup>5-7</sup> The Perdew-Burke-Ernzerhof (PBE) exchange-correlation functional<sup>8</sup> within the generalized gradient approximation (GGA) was employed to describe the exchange-correlation energy. The projector-augmented-wave (PAW) method<sup>9</sup> was adopted for the pseudopotentials. The energy cutoff for the plane wave basis expansion was set to 450 eV. The force on each atom was set as 0.02 eV/Å for convergence criterion. Slab model was constructed in a  $1 \times 4 \times 1$  supercell with three layers of CuS (103), where the bottom layer was fixed. A vacuum layer of 15 Å in the z direction avoids the interaction between layers. The Brillouin-zone integration was sampled by single  $\Gamma$  point.<sup>10</sup>

The free energies of the NRR steps were calculated using the equation:<sup>11</sup>

$$\Delta G = \Delta E_{\text{DFT}} + \Delta E_{\text{ZPE}} - T\Delta S$$

Where  $\Delta E_{\text{DFT}}$  is the DFT calculated binding energy, the  $\Delta E_{\text{ZPE}}$  and  $T\Delta S$  are the zero-point energy correction and the variation of entropy, respectively, which gotten from vibration calculations.<sup>12</sup>

The surface energy of CuS can be evaluated by  $\sigma$ , which is defined as:

$$\sigma = (E_{(\text{sur})} - N \times E_{(\text{bulk})}) \times \frac{1}{2A}$$

in which  $E_{(\text{sur})}$  and  $E_{(\text{bulk})}$  are the energies of all research surface and bulk CuS, respectively. N is the number of bulk structure. A represents the surface area of each surface.

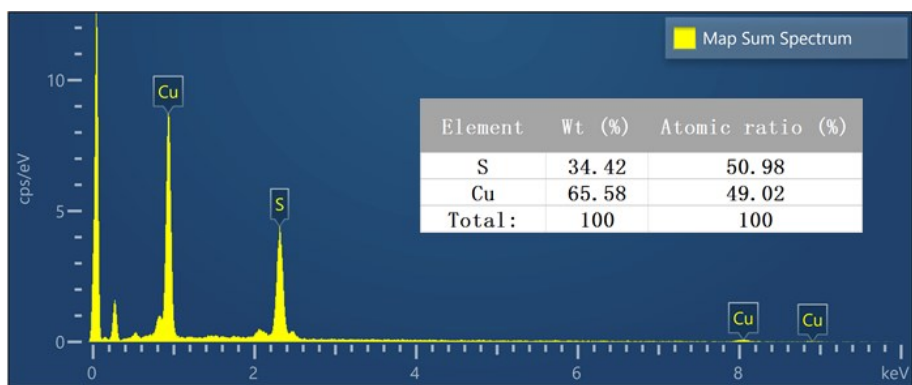

**Fig. S1.** EDX spectrum of CuS-CPSs.

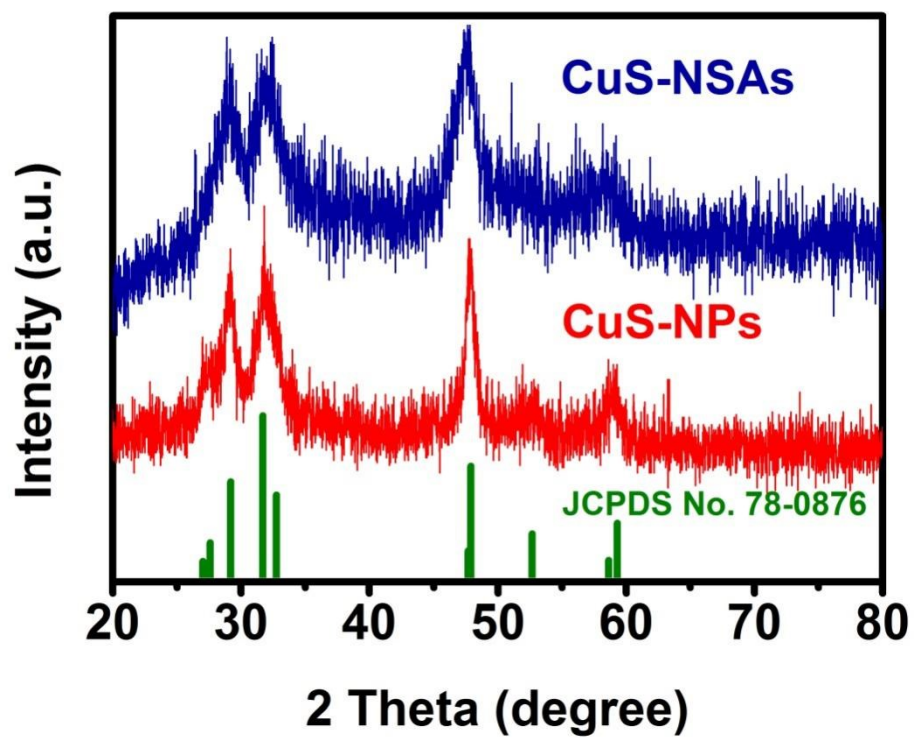

Fig. S2. XRD patterns of CuS-NPs and CuS-NSAs.

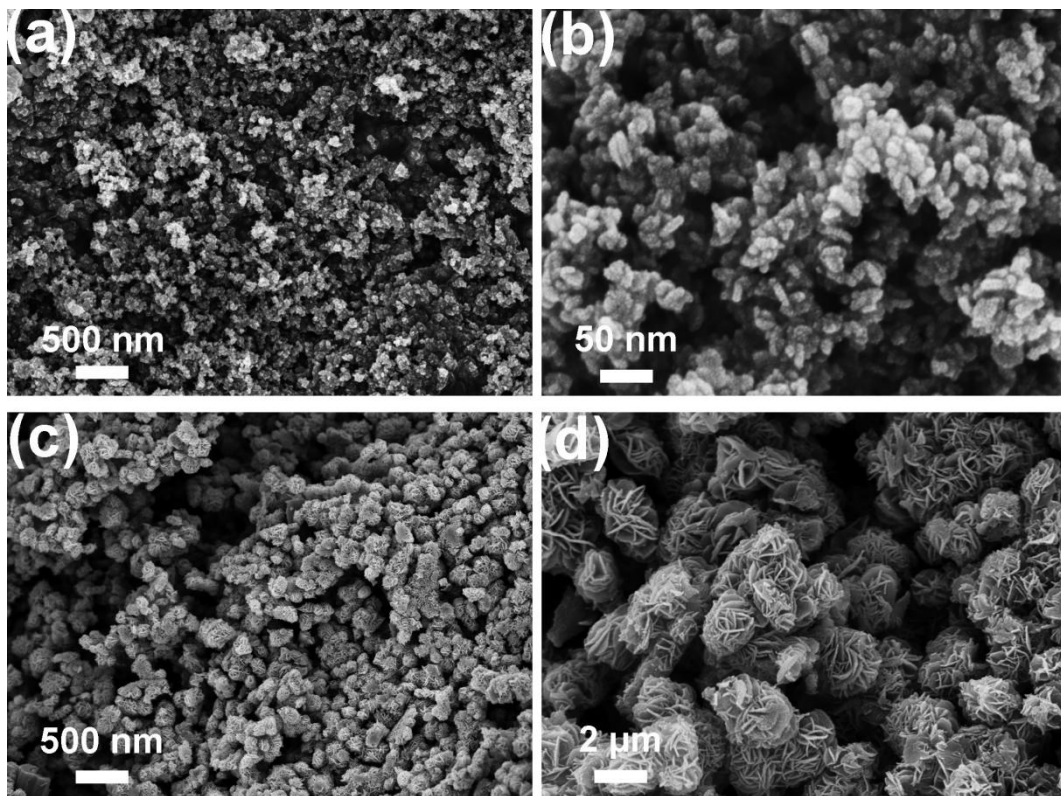

**Fig. S3.** SEM images of (a,b) CuS-NPs and (c,d) CuS-NSAs.

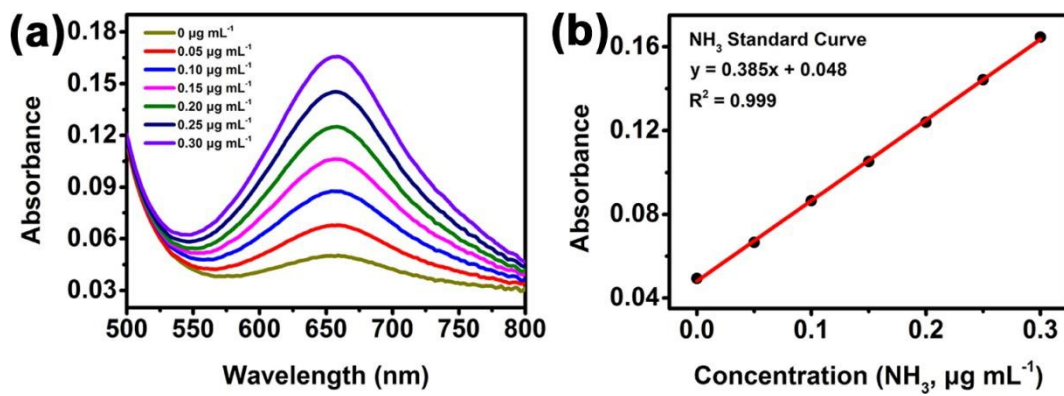

**Fig. S4.** (a) UV-vis absorption spectra of indophenol assays with  $\text{NH}_3$  concentrations after incubated for 2 h at room temperature. (b) Calibration curve used for calculation of  $\text{NH}_3$  concentrations.



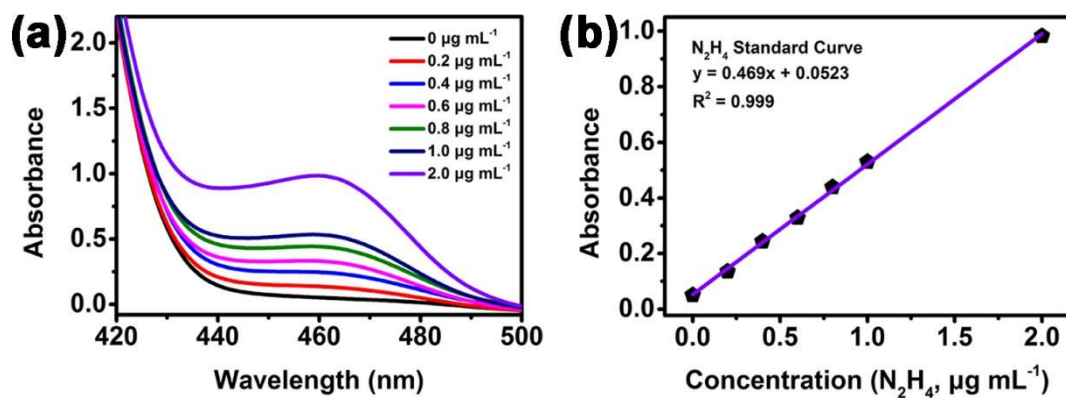

**Fig. S5.** (a) UV-vis absorption spectra of  $N_2H_4$  concentrations after incubated for 20 min at room temperature. (b) Calibration curve used for calculation of  $N_2H_4$  concentrations.

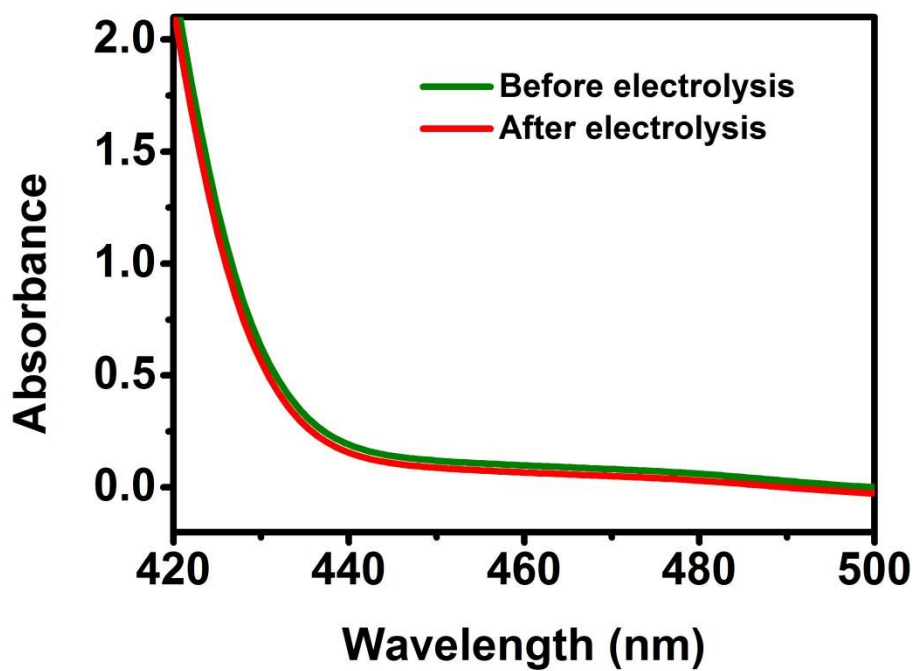

**Fig. S6.** UV-vis absorption spectra of electrolytes stained with para-(dimethylamino) benzaldehyde indicator before and after 2 h electrolysis at  $-0.15$  V.

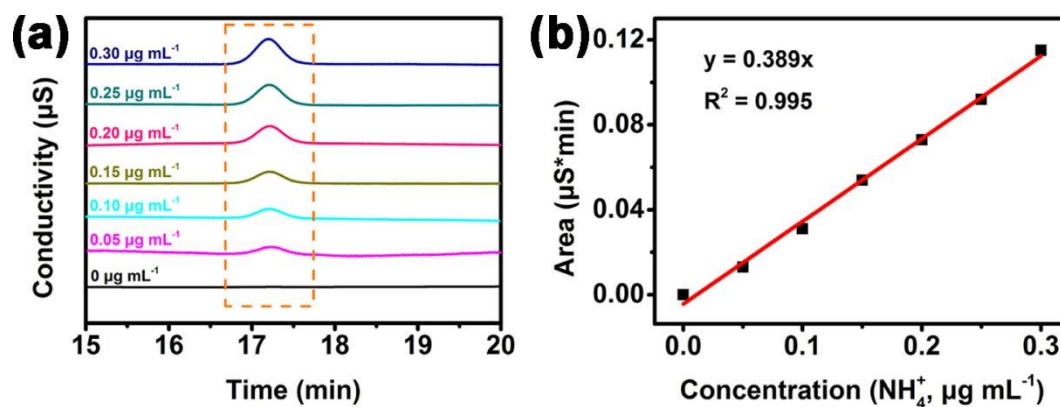

**Fig. S7.** (a) Ion chromatograms of  $\text{NH}_4^+$  with different concentrations in 0.1 M HCl and (b) corresponding standard curve.

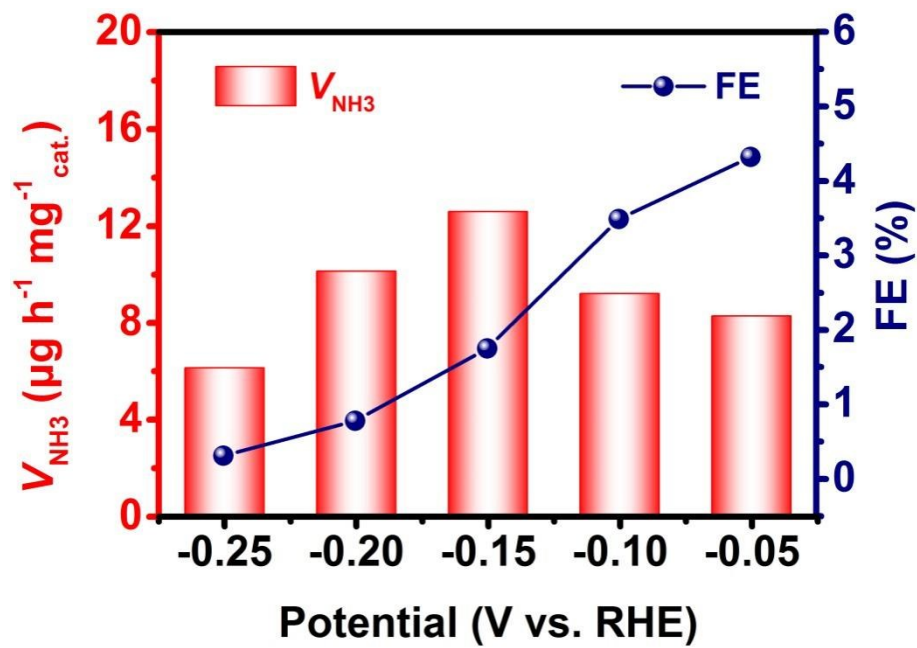

Fig. S8.  $V_{\text{NH}_3}$  and FE for CuS-CPSs/CP tested in 0.1 M  $\text{Na}_2\text{SO}_4$ .

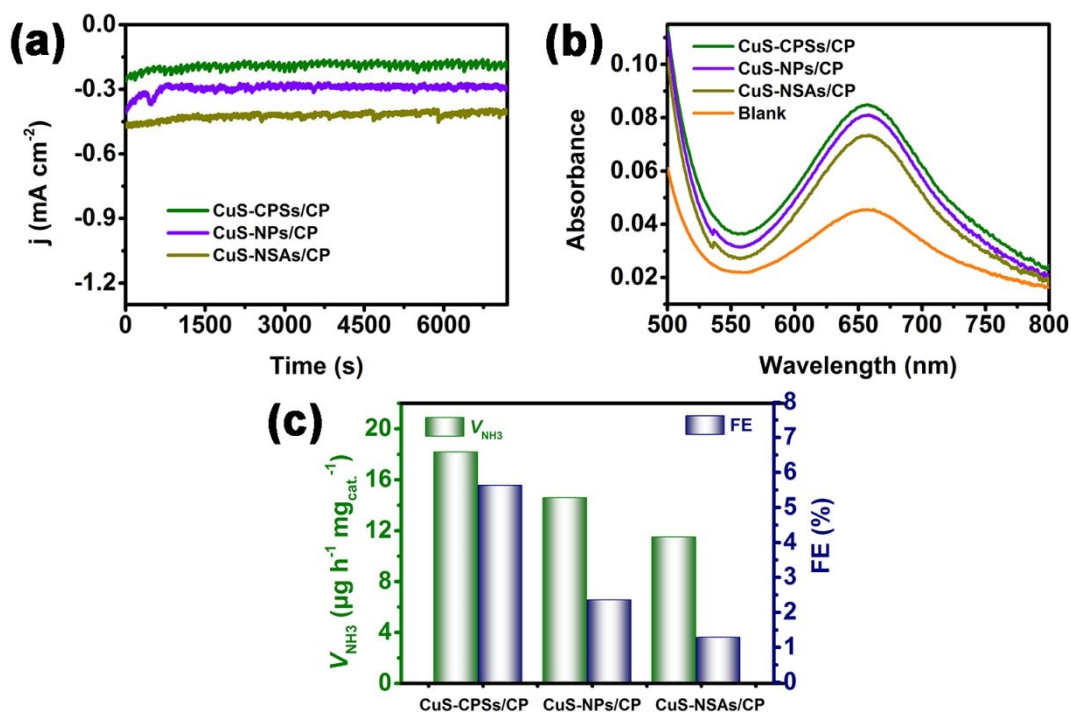

**Fig. S9.** (a) Time-dependent current density curves for CuS-CPSs/CP, CuS-NPs/CP and CuS-NSAs/CP at  $-0.15$  V. (b) UV-vis absorption spectra of the electrolytes stained with indophenol indicator after 2 h electrolysis using CuS-CPSs/CP, CuS-NPs/CP and CuS-NSAs/CP. (c) Comparison of  $V_{\text{NH}_3}$  and FE for CuS-CPSs/CP, CuS-NPs/CP and CuS-NSAs/CP.

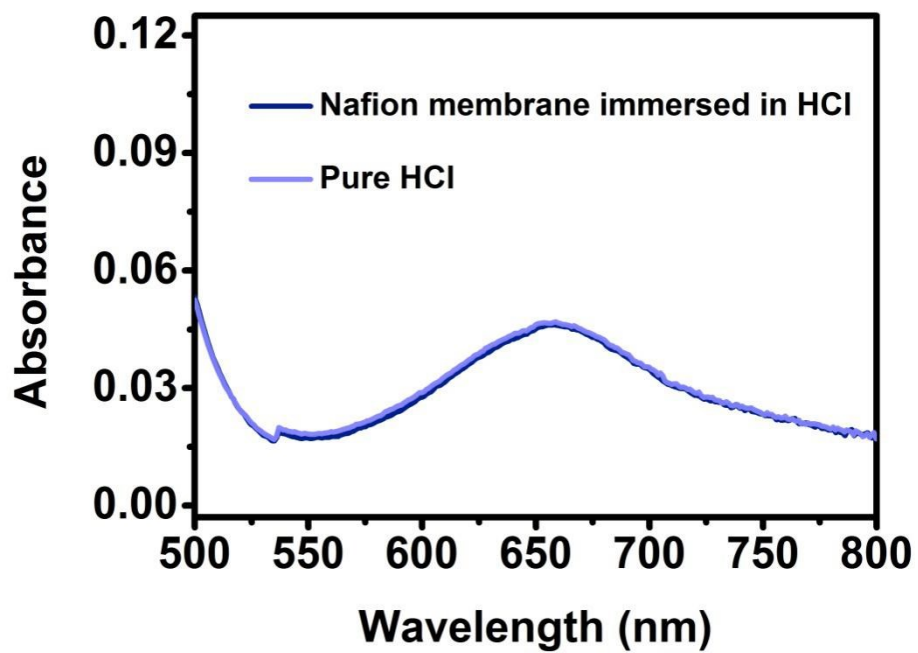

**Fig. S10.** Comparison of UV-vis absorption spectra of Nafion membrane immersed in 0.1 M HCl for 2 h and pure 0.1 M HCl.

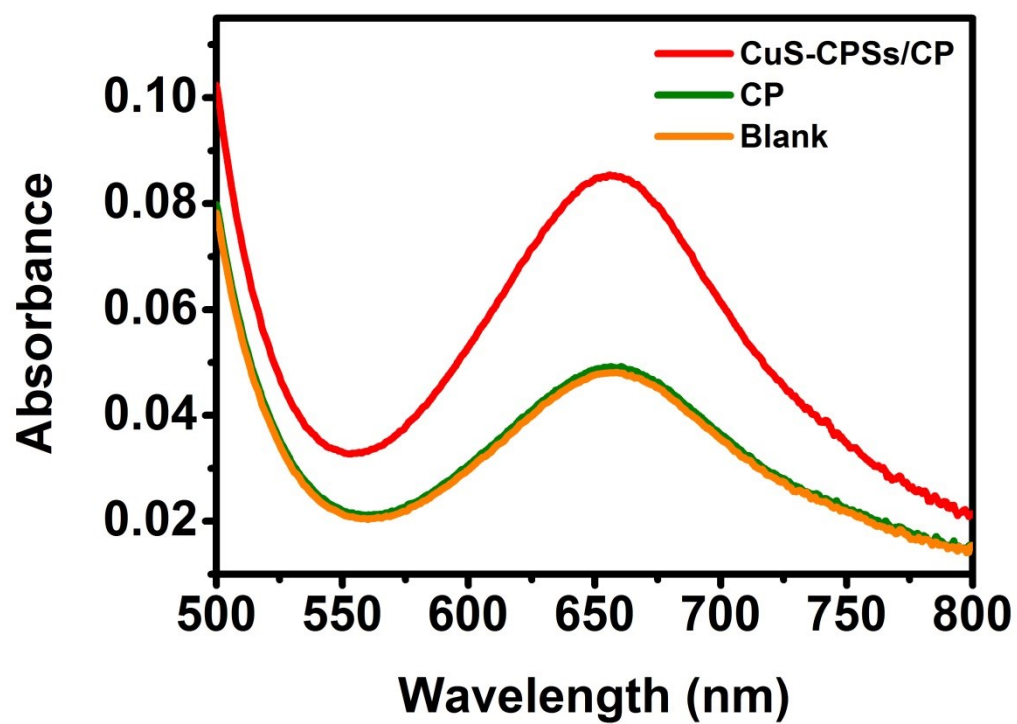

**Fig. S11.** UV-vis absorption spectra of the electrolytes colored with the indophenol indicator after NRR electrolysis at different electrodes for 2 h.

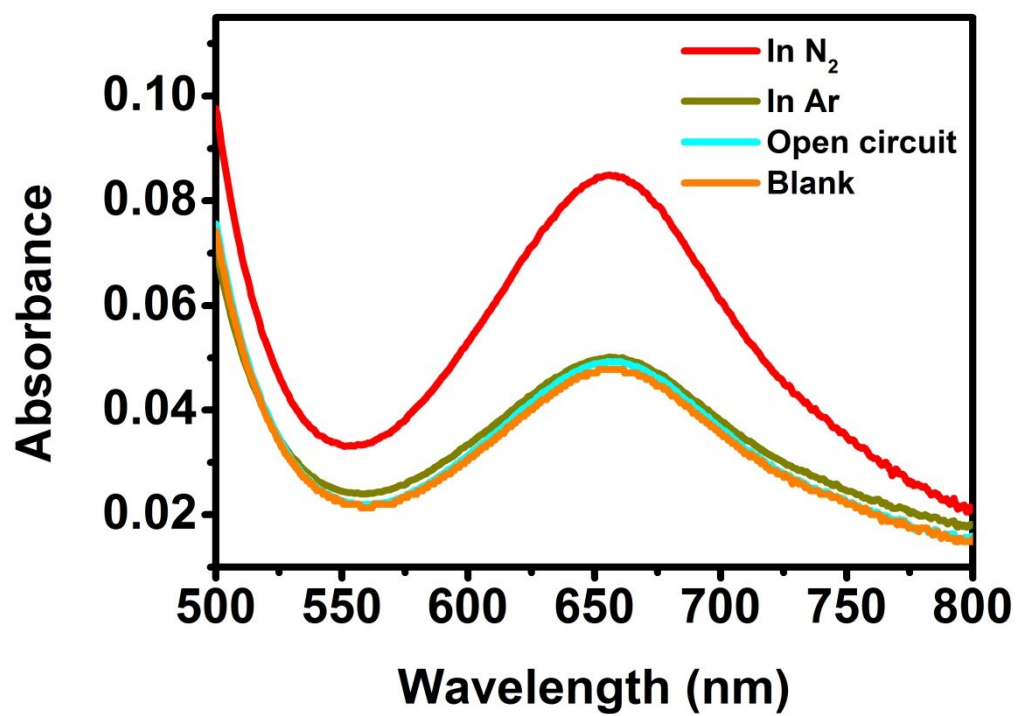

**Fig. S12.** UV-vis absorption spectra of the electrolytes stained with indophenol indicator after 2 h electrolysis under different electrochemical conditions using CuS-CPSs/CP.



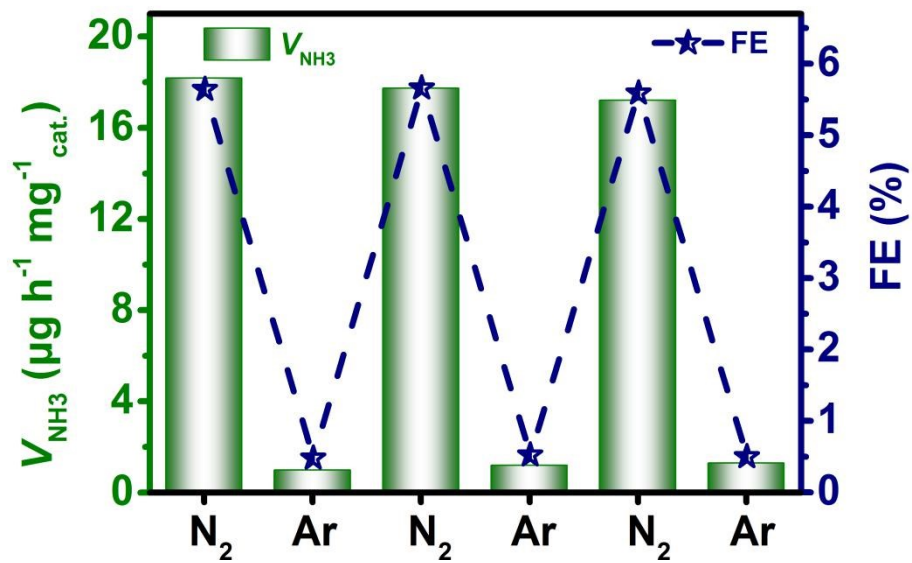

**Fig. S13.**  $V_{\text{NH}_3}$  and FE of alternative N<sub>2</sub>-saturated and Ar-saturated tests over CuS-CPSs/CP at -0.15 V for 2 h.

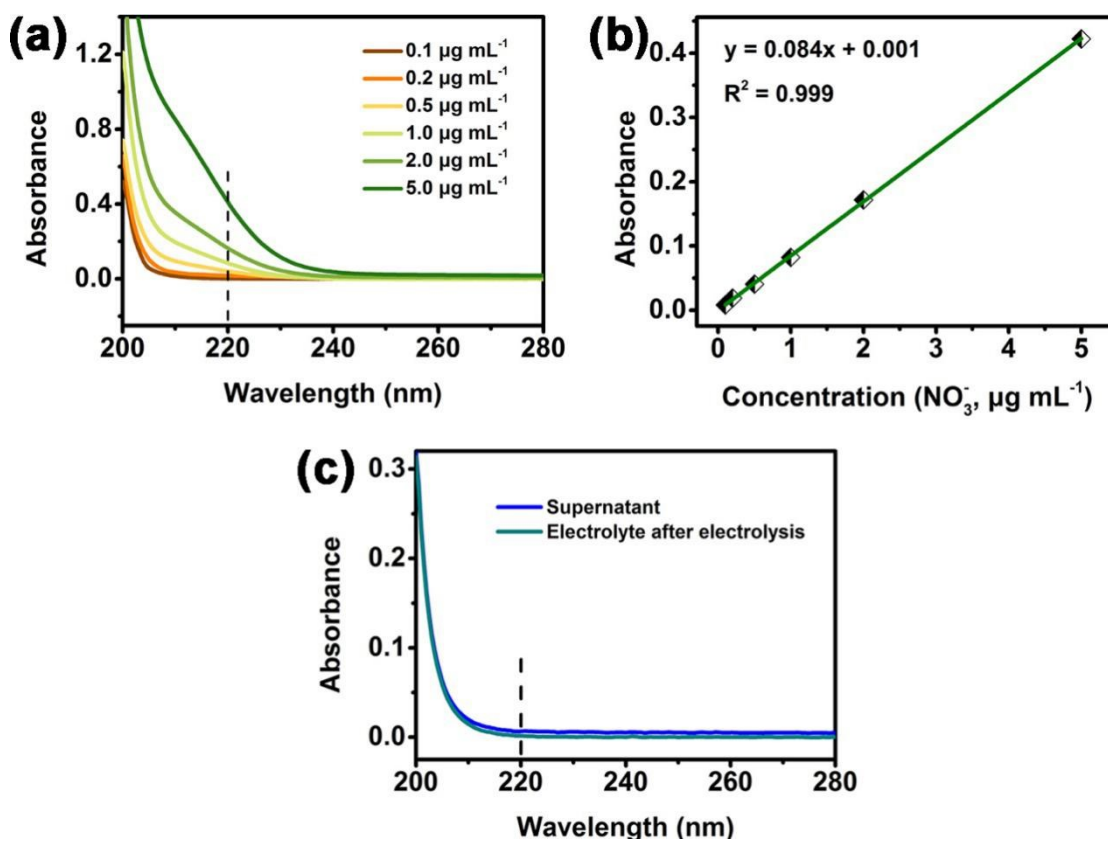

**Fig. S14.** (a) UV-vis absorption spectra of different concentrations of  $\text{LiNO}_3$ . (b) Calibration curve used for calculating the concentration of  $\text{NO}_3^-$ . (c) UV-vis absorption spectra for the determination of  $\text{NO}_3^-$  in the supernatant of the washed CuS-CPSs and in 0.1 M HCl after electrolysis.

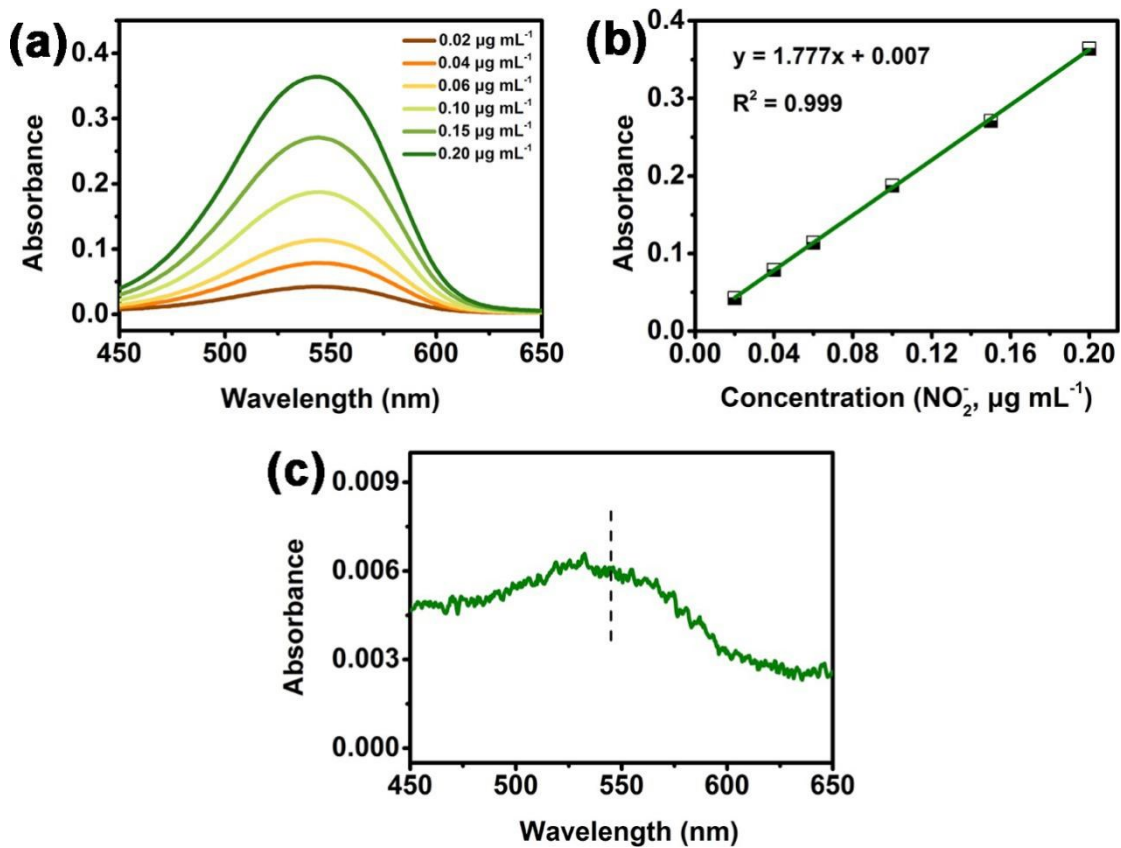

**Fig. S15.** (a) UV-vis spectra of various concentrations of  $\text{NaNO}_2$ . (b) Calibration curve used for calculating the concentration of  $\text{NO}_2^-$ . (c) UV-vis spectra for the determination of  $\text{NO}_2^-$  in 0.1 M HCl after electrolysis.

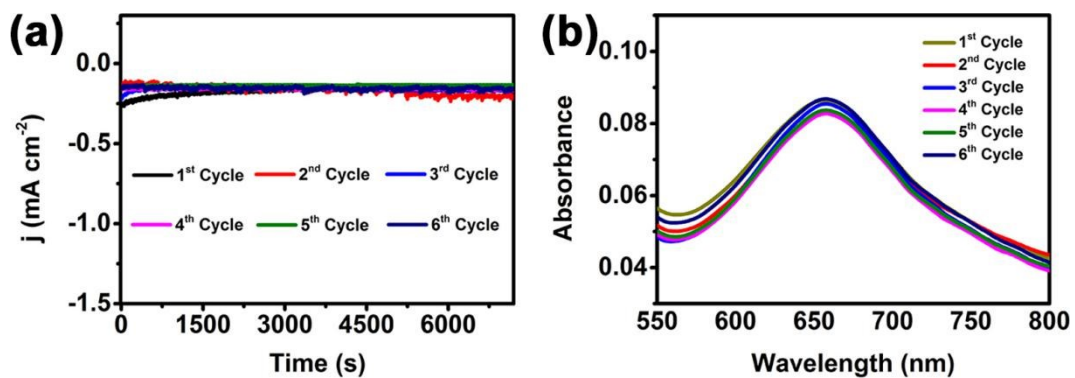

**Fig. S16.** (a) Time-dependent current density curves for CuS-CPSs/CP at  $-0.15$  V over 6 cycles. (b) UV-vis absorption spectra of the electrolytes stained with indophenol indicator after electrolysis for CuS-CPSs/CP at  $-0.15$  V over 6 cycles.

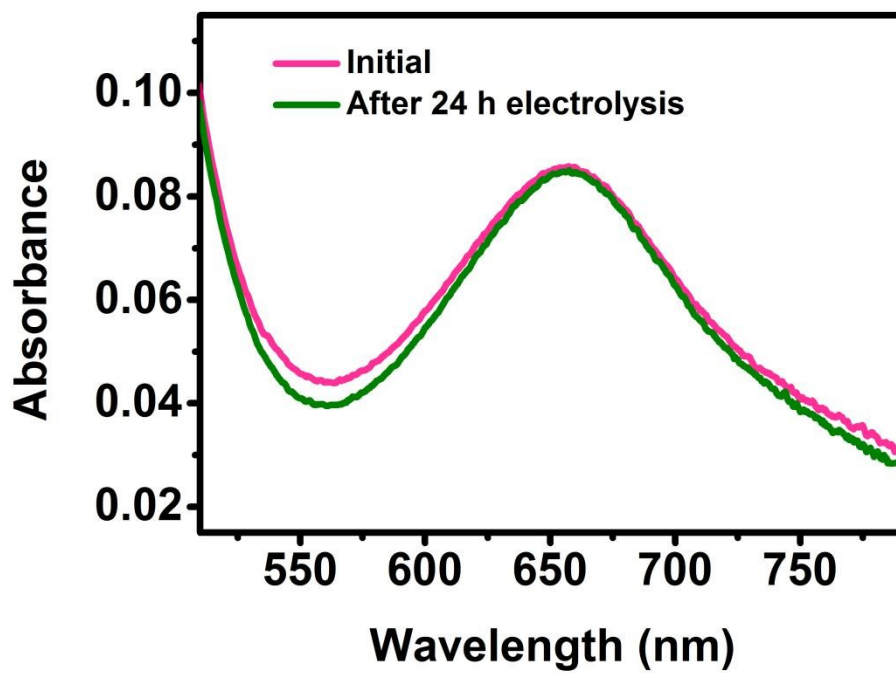

**Fig. S17.** UV-vis absorption spectra of the electrolytes stained with indophenol indicator at  $-0.15$  V after electrolysis for 2 h with the initial CuS-CPSs/CP and the CuS-CPSs/CP after 24 h electrolysis.

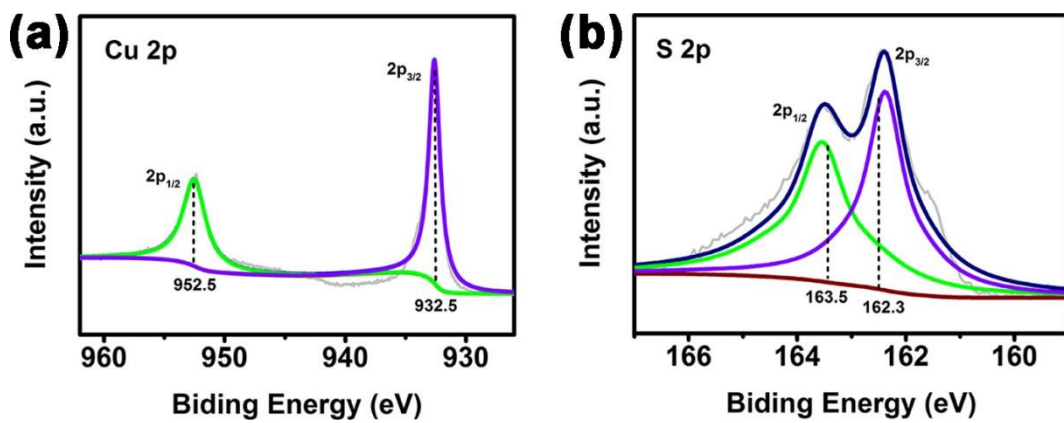

**Fig. S18.** XPS spectra of post-NRR CuS-CPSs in the (a) Cu 2p and (b) S 2p regions.

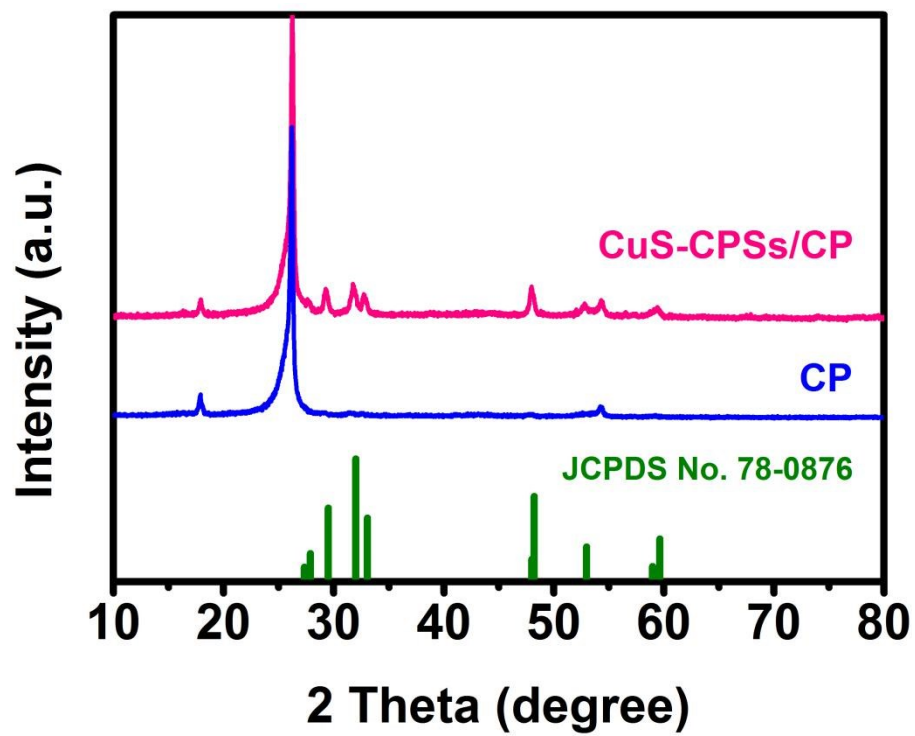

Fig. S19. XRD patterns of CP and post-NRR CuS-CPSs/CP.

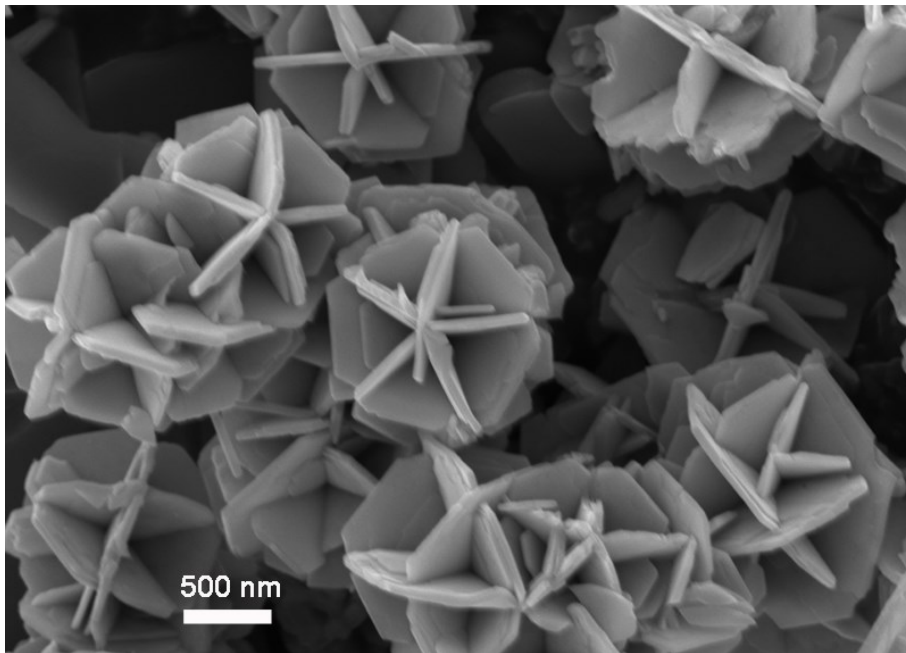

**Fig. S20.** SEM image of post-NRR CuS-CPSs/CP.



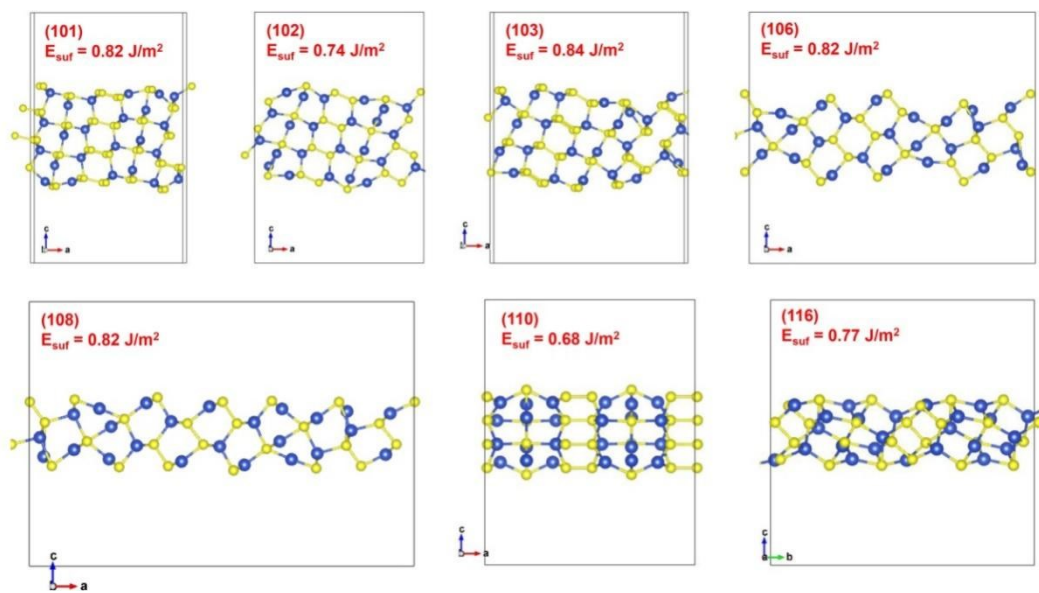

Fig. S21. Surface energies of different facets for CuS.

**Table S1.** Comparison of electrocatalytic N<sub>2</sub> reduction performance of CuS-CPSs with other NRR electrocatalysts in acidic electrolytes at ambient conditions.

| Catalyst                                                 | Electrolyte                           | NH <sub>3</sub> yield                                     | FE (%) | Ref.      |
|----------------------------------------------------------|---------------------------------------|-----------------------------------------------------------|--------|-----------|
| CuS-CPSs                                                 | 0.1 M HCl                             | 18.18 μg h <sup>-1</sup> mg <sup>-1</sup> <sub>cat.</sub> | 5.63   | This work |
| CoS <sub>2</sub> @NC                                     | 0.1 M HCl                             | 17.45 μg h <sup>-1</sup> mg <sup>-1</sup> <sub>cat.</sub> | 4.6    | 13        |
| FeMoS                                                    | 0.1 M HCl                             | 8.45 μg h <sup>-1</sup> mg <sup>-1</sup> <sub>cat.</sub>  | 2.96   | 14        |
| Co-dopd MoS <sub>2-x</sub>                               | 0.01 M H <sub>2</sub> SO <sub>4</sub> | 0.6 μg h <sup>-1</sup> mg <sup>-1</sup> <sub>cat.</sub>   | 10     | 15        |
| MoS <sub>2</sub> /C <sub>3</sub> N <sub>4</sub>          | 0.1 M HCl                             | 18.5 μg h <sup>-1</sup> mg <sup>-1</sup> <sub>cat.</sub>  | 17.8   | 16        |
| ZrS <sub>2</sub> NF-Vs                                   | 0.1 M HCl                             | 30.72 μg h <sup>-1</sup> mg <sup>-1</sup> <sub>cat.</sub> | 10.33  | 17        |
| W <sub>2</sub> N <sub>3</sub>                            | 0.1 M HCl                             | 11.66 μg h <sup>-1</sup> mg <sup>-1</sup> <sub>cat.</sub> | 11.67  | 18        |
| MoO <sub>2</sub> -OVs                                    | 0.1 M HCl                             | 12.2 μg h <sup>-1</sup> mg <sup>-1</sup> <sub>cat.</sub>  | 8.2    | 19        |
| NPC                                                      | 0.1 M HCl                             | 0.97 μg h <sup>-1</sup> mg <sup>-1</sup> <sub>cat.</sub>  | 4.2    | 20        |
| ZrO <sub>2</sub>                                         | 0.1 M HCl                             | 24.74 μg h <sup>-1</sup> mg <sup>-1</sup> <sub>cat.</sub> | 5.0    | 21        |
| Ru single-atoms/Zn                                       | 0.1 M HCl                             | 3.665 μg h <sup>-1</sup> mg <sup>-1</sup> <sub>cat.</sub> | 21     | 22        |
| La <sub>2</sub> Ti <sub>2</sub> O <sub>7</sub> nanosheet | 0.1 M HCl                             | 25.15 μg h <sup>-1</sup> mg <sup>-1</sup> <sub>cat.</sub> | 4.55   | 23        |
| Mo nanofilm                                              | 0.01 M H <sub>2</sub> SO <sub>4</sub> | 1.89 μg h <sup>-1</sup> mg <sup>-1</sup> <sub>cat.</sub>  | 0.72   | 24        |
| B-doped graphene                                         | 0.05 M H <sub>2</sub> SO <sub>4</sub> | 9.8 μg h <sup>-1</sup> mg <sup>-1</sup> <sub>cat.</sub>   | 10.8   | 25        |
| N-doped porous carbon                                    | 0.05 M H <sub>2</sub> SO <sub>4</sub> | 15.7 μg h <sup>-1</sup> mg <sup>-1</sup> <sub>cat.</sub>  | 1.45   | 26        |
| LiMn <sub>2</sub> O <sub>4</sub> nanofiber               | 0.1 M HCl                             | 15.83 μg h <sup>-1</sup> mg <sup>-1</sup> <sub>cat.</sub> | 7.44   | 27        |
| TiC/C nanofiber                                          | 0.1 M HCl                             | 14.1 μg h <sup>-1</sup> mg <sup>-1</sup> <sub>cat.</sub>  | 5.8    | 28        |
| Ag nanosheets                                            | 0.1 M HCl                             | 2.83 μg h <sup>-1</sup> mg <sup>-1</sup> <sub>cat.</sub>  | 4.8    | 29        |
| α-Au/CeO <sub>x</sub> -RGO                               | 0.1 M HCl                             | 8.3 μg h <sup>-1</sup> mg <sup>-1</sup> <sub>cat.</sub>   | 10.10  | 30        |
| Bi nanosheet array                                       | 0.1 M HCl                             | 5.26 μg h <sup>-1</sup> mg <sup>-1</sup> <sub>cat.</sub>  | 10.26  | 31        |
| MoO <sub>3</sub> nanosheets                              | 0.1 M HCl                             | 29.43 μg h <sup>-1</sup> mg <sup>-1</sup> <sub>cat.</sub> | 1.9    | 32        |
| Black Phosphorus                                         | 0.1 M HCl                             | 31.37 μg h <sup>-1</sup> mg <sup>-1</sup> <sub>cat.</sub> | 5.07   | 33        |

## References

- 1 W. He, H. Jia, X. Li, Y. Lei, J. Li, H. Zhao, L. Mi, L. Zhang and Zhi Zheng, Understanding the formation of CuS concave superstructures with peroxidase-like activity. *Nanoscale*, 2012, **4**, 3501–3506.
- 2 D. Zhu, L. Zhang, R. E. Ruther and R. J. Hamers, Photo-illuminated diamond as a solid-state source of solvated electrons in water for nitrogen reduction. *Nat. Mater.*, 2013, **12**, 836–841.
- 3 G. W. Watt and J. D. Chrisp, A spectrophotometric method for the determination of hydrazine. *Anal. Chem.*, 1952, **24**, 2006–2008.
- 4 A. P. Carvalho, L. A. Meireles and F. X. Malcata, Rapid spectrophotometric determination of nitrates and nitrites in marine aqueous culture media. *Analysis*, 1998, **26**, 347–351.
- 5 G. Kresse and J. Furthmuller, Efficiency of ab-initio total energy calculations for metals and semiconductors using a plane-wave basis set. *Comp. Mater. Sci.*, 1996, **6**, 15–50.
- 6 G. Kresse and J. Furthmuller, Efficient iterative schemes for ab initio total-energy calculations using a plane-wave basis set. *Phys. Rev. B*, 1996, **54**, 11169–11186.
- 7 G. Kresse and J. Hafner, Ab initio molecular-dynamics simulation of the liquid-metal–amorphous-semiconductor transition in germanium. *Phys. Rev. B*, 1994, **49**, 14251–14269.
- 8 J. Perdew, J. A. Chevary, S. H. Vosko, K. Jackson, M. Pederson, D. J. Singh and C. Fiolhais, Atoms, molecules, solids, and surfaces: Applications of the generalized gradient approximation for exchange and correlation. *Phys. Rev. B*, 1992, **46**, 6671–6687.
- 9 P. E. Blochl, Projector augmented-wave method. *Phys. Rev. B*, 1994, **50**, 17953–17979.
- 10 H. J. Monkhorst and J. D. Pack, Special points for brillouin-zone integrations. *Phys. Rev. B*, 1976, **13**, 5188–5192.
- 11 E. Skulason, T. Bligaard, S. Gudmundsdottir, F. Studt, J. Rossmeisl, F. Abild-Pedersen, T. Vegge, H. Jonsson and J. K. Nørskov, A theoretical evaluation of possible transition metal electro-catalysts for N<sub>2</sub> reduction. *Phys. Chem. Chem. Phys.*, 2012, **14**, 1235–1245.

- 12 H. T. D. Nguyen, Y. B. N. Tran, H. N. Nguyen, T. C. Nguyen, F. Gándara and P. T. K. Nguyen, A series of metal-organic frameworks for selective CO<sub>2</sub> capture and catalytic oxidative carboxylation of olefins. *Inorg. Chem.*, 2018, **57**, 13772–13782.
- 13 P. Wei, H. Xie, X. Zhu, R. Zhao, L. Ji, X. Tong, Y. Luo, G. Cui, Z. Wang and X. Sun, CoS<sub>2</sub> nanoparticles-embedded N-doped carbon nanobox derived from ZIF-67 for electrocatalytic N<sub>2</sub>-to-NH<sub>3</sub> fixation under ambient conditions. *ACS Sustainable Chem. Eng.*, 2020, **8**, 29–33.
- 14 Y. Guo, Z. Yao, B. J. J. Timmera, X. Sheng, L. Fan, Y. Li, F. Zhang and L. Sun, Boosting nitrogen reduction reaction by bio-inspired FeMoS containing hybrid electrocatalyst over a wide pH range. *Nano Energy*, 2019, **62**, 282–288.
- 15 J. Zhang, X. Tian, M. Liu, H. Guo, J. Zhou, Q. Fang, Z. Liu, Q. Wu and J. Lou, Cobalt-modulated molybdenum-dinitrogen interaction in MoS<sub>2</sub> for catalyzing ammonia synthesis. *J. Am. Chem. Soc.*, 2019, **141**, 19269–19275.
- 16 K. Chu, Y. Liu, Y. Li, Y. Guo and Y. Tian, Two-dimensional (2D)/2D interface engineering of a MoS<sub>2</sub>/C<sub>3</sub>N<sub>4</sub> heterostructure for promoted electrocatalytic nitrogen fixation. *ACS Appl. Mater. Interfaces*, 2020, **12**, 7081–7090.
- 17 T. Xu, D. Ma, T. Li, L. Yue, Y. Luo, S. Lu, X. Shi, A. M. Asiri, C. Yang and X. Sun, Enhanced electrocatalytic N<sub>2</sub>-to-NH<sub>3</sub> fixation by ZrS<sub>2</sub> nanofibers with a sulfur vacancy. *Chem. Commun.*, 2020, **56**, 14031–14034.
- 18 H. Jin, L. Li, X. Liu, C. Tang, W. Xu, S. Chen, L. Song, Y. Zheng and S. Qiao, Nitrogen vacancies on 2D layered W<sub>2</sub>N<sub>3</sub>: A stable and efficient active site for nitrogen reduction reaction. *Adv. Mater.*, 2019, **31**, 1902709.
- 19 G. Zhang, Q. Jia, K. Zhang, Y. Chen, Z. Lie, H. Liu, J. Li and J. Qua, Triggering surface oxygen vacancies on atomic layered molybdenum dioxide for a low energy consumption path toward nitrogen fixation. *Nano Energy*, 2019, **59**, 10–16.
- 20 P. Song, H. Wang, L. Kang, B. Ran, H. Song and R. Wang, Electrochemical nitrogen reduction to ammonia at ambient conditions on nitrogen and phosphorus co-doped porous carbon. *Chem. Commun.*, 2019, **55**, 687–690.
- 21 T. Xu, D. Ma, C. Li, Q. Liu, S. Lu, A. M. Asiri, C. Yang and X. Sun, Ambient electrochemical NH<sub>3</sub> synthesis from N<sub>2</sub> and water enabled by ZrO<sub>2</sub> nanoparticles. *Chem. Commun.*, 2020, **56**, 3673–3676.

- 22 H. Tao, C. Choi, L. Ding, Z. Jiang, Z. Han, M. Jia, Q. Fan, Y. Gao, H. Wang, A. W. Robertson, S. Hong, Y. Jung, S. Liu and Z. Sun, Nitrogen fixation by Ru single-atom electrocatalytic reduction. *Chem*, 2019, **5**, 204–214.
- 23 J. Yu, C. Li, B. Li, X. Zhu, R. Zhang, L. Ji, D. Tang, A. M. Asiri, X. Sun, Q. Li, S. Liu and Y. Luo, A perovskite  $\text{La}_2\text{Ti}_2\text{O}_7$  nanosheet as an efficient electrocatalyst for artificial  $\text{N}_2$  fixation to  $\text{NH}_3$  in acidic media. *Chem. Commun.*, 2019, **55**, 6401–6404.
- 24 D. Yang, T. Chen and Z. Wang, Electrochemical reduction of aqueous nitrogen ( $\text{N}_2$ ) at a low overpotential on (110)-oriented Mo nanofilm. *J. Mater. Chem. A*, 2017, **5**, 18967–18971.
- 25 X. Yu, P. Han, Z. Wei, L. Huang, Z. Gu, S. Peng, J. Ma and G. Zheng, Boron-doped graphene for electrocatalytic  $\text{N}_2$  reduction. *Joule*, 2018, **2**, 1610–1622.
- 26 X. Yang, K. Li, D. Cheng, W. Pang, J. Lv, X. Chen, H. Zang, X. Wu, H. Tan, Y. Wang and Y. Li, Nitrogen-doped porous carbon: Highly efficient trifunctional electrocatalyst for oxygen reversible catalysis and nitrogen reduction reaction. *J. Mater. Chem. A*, 2018, **6**, 7762–7769.
- 27 C. Li, J. Yu, L. Yang, J. Zhao, W. Kong, T. Wang, A. M. Asiri, Q. Li and X. Sun, An efficient electrocatalyst for  $\text{N}_2$  reduction to  $\text{NH}_3$  under ambient conditions. *Inorg. Chem.*, 2019, **58**, 9597–9601.
- 28 G. Yu, H. Guo, W. Kong, T. Wang, Y. Luo, X. Shi, A. M. Asiri, T. Li and X. Sun, Electrospun TiC/C nanofibers for ambient electrocatalytic  $\text{N}_2$  reduction. *J. Mater. Chem. A*, 2019, **7**, 19657–19661.
- 29 H. Huang, L. Xia, X. Shi, A. M. Asiri and X. Sun, Ag nanosheets for efficient electrocatalytic  $\text{N}_2$  fixation to  $\text{NH}_3$  under ambient conditions. *Chem. Commun.*, 2018, **54**, 11427–11430.
- 30 S. Li, D. Bao, M. Shi, B. Wulan, J. Yan and Q. Jiang, Amorphizing of Au nanoparticles by  $\text{CeO}_x$ -RGO hybrid support towards highly efficient electrocatalyst for  $\text{N}_2$  reduction under ambient conditions. *Adv. Mater.*, 2017, **29**, 1700001.
- 31 R. Zhang, L. Ji, W. Kong, H. Wang, R. Zhao, H. Chen, T. Li, B. Li, Y. Luo and X. Sun, Electrocatalytic  $\text{N}_2$ -to- $\text{NH}_3$  conversion with high faradaic efficiency enabled using a Bi nanosheet array. *Chem. Commun.*, 2019, **55**, 5263–5266.

- 32 J. Han, X. Ji, X. Ren, G. Cui, L. Li, F. Xie, H. Wang, B. Li and X. Sun, MoO<sub>3</sub> nanosheets for efficient electrocatalytic N<sub>2</sub> fixation to NH<sub>3</sub>. *J. Mater. Chem. A*, 2018, **6**, 12974–12977.
- 33 L. Zhang, L. Ding, G. Chen and X. Yang and H. Wang, Ammonia synthesis under ambient conditions: Selective electroreduction of dinitrogen to ammonia on black phosphorus nanosheets. *Angew. Chem. Int. Ed.*, 2019, **58**, 2612–2616.
